# Supplementary material for: Structure of Csx1-cOA4 complex reveals the basis of RNA decay in Type III-B CRISPR-Cas
Source: PubMed Central journal article supplement (PMC6754442; doi:10.1038/s41467-019-12244-z), 2019-09-20
Supplement: 41467_2019_12244_MOESM2_ESM.pdf [file 41467_2019_12244_MOESM2_ESM.pdf]

**Editorial Note:** This manuscript has been previously reviewed at another journal that is not operating a transparent peer review scheme. The manuscript was considered suitable for publication without further review at *Nature Communications*.
